# Supplementary material
Source: MDPI journal article supplement (https://www.mdpi.com/2076-3417/13/9/5401)
Supplement: s1 [file s1]

## Sensor specification

Sample rate: 50 Hz

Acceleration range:  $\pm 16g$

Angular velocity range:  $2000^{\circ}/s$

Accelerometer sensitivity:

$\pm 2g$ : 16,384 LSB/g

$\pm 4g$ : 8,192 LSB/g

$\pm 8g$ : 4,096 LSB/g

$\pm 16g$ : 2,048 LSB/g

Gyroscope sensitivity:

$\pm 125^{\circ}/s$ : 262.4 LSB/ $^{\circ}/s$

$\pm 250^{\circ}/s$ : 131.2 LSB/ $^{\circ}/s$

$\pm 500^{\circ}/s$ : 65.6 LSB/ $^{\circ}/s$

$\pm 1000^{\circ}/s$ : 32.8 LSB/ $^{\circ}/s$

$\pm 2000^{\circ}/s$ : 16.4 LSB/ $^{\circ}/s$
